# Supplementary material for: The Study of Protein–Cyclitol Interactions
Source: MDPI journal article supplement (doi:10.3390/ijms23062940), 2022-03-09
Supplement: s1 [file s1]

## Supplementary Materials

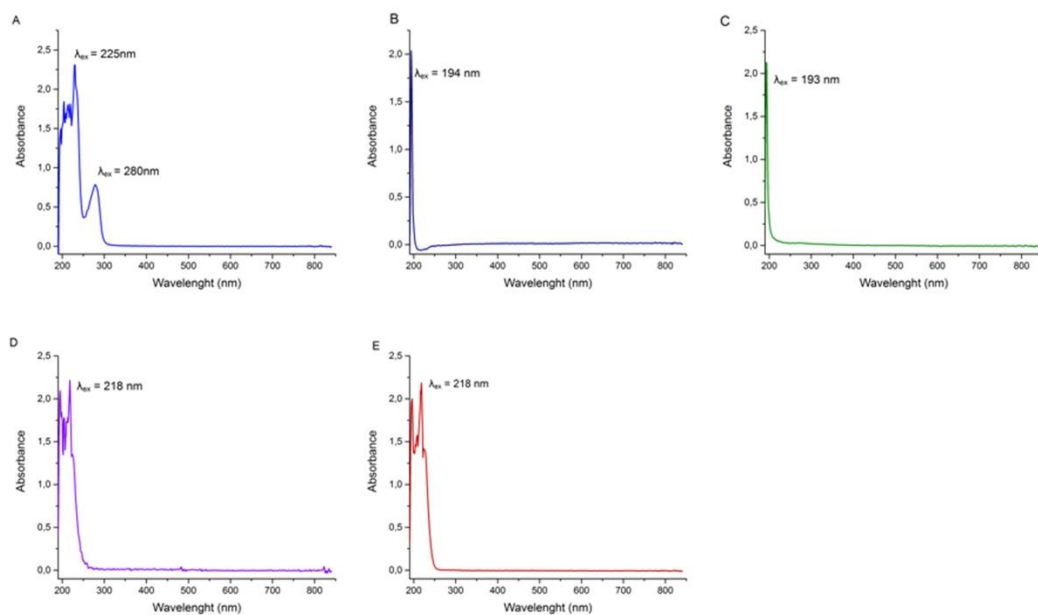

**Figure S1.** UV-VIS spectra of: A) BSA (1.0 mg/mL); B) D-sorbitol ( $3.01 \times 10^{-2}$  M); C) Adonitol ( $3.01 \times 10^{-2}$  M); D) Shikimic acid ( $3.01 \times 10^{-2}$  M); E) D-(-)-quinic acid ( $3.01 \times 10^{-2}$  M).

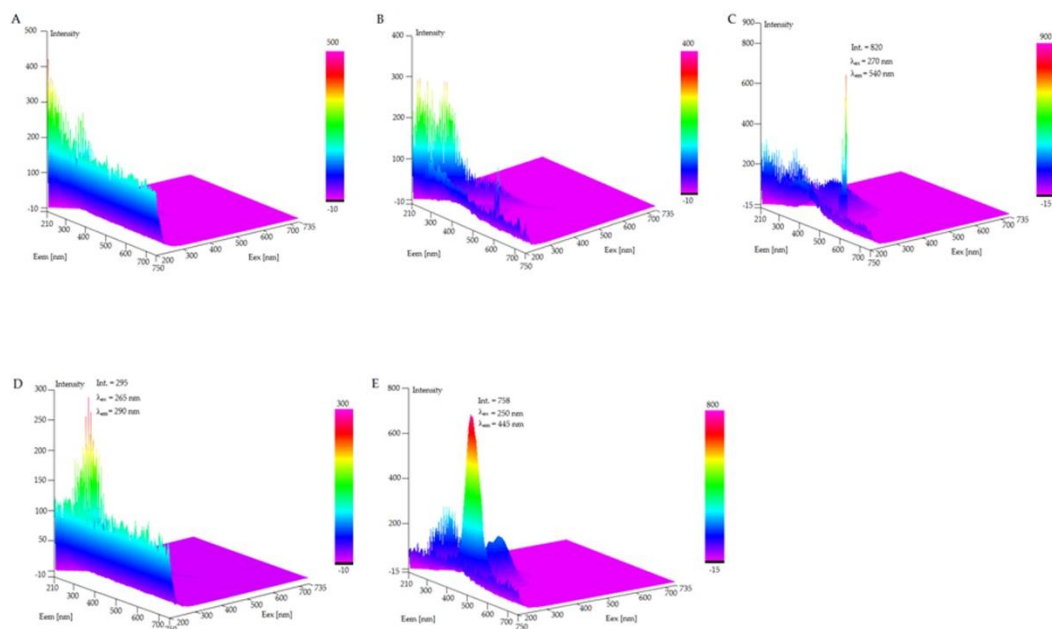

**Figure S2.** 3D-fluorescence spectra of : A) water; B) D-sorbitol ( $3.01 \times 10^{-2}$  M); C) Adonitol ( $3.01 \times 10^{-2}$  M); D) Shikimic acid ( $3.01 \times 10^{-2}$  M); E) D-(-)-quinic acid ( $3.01 \times 10^{-2}$  M).

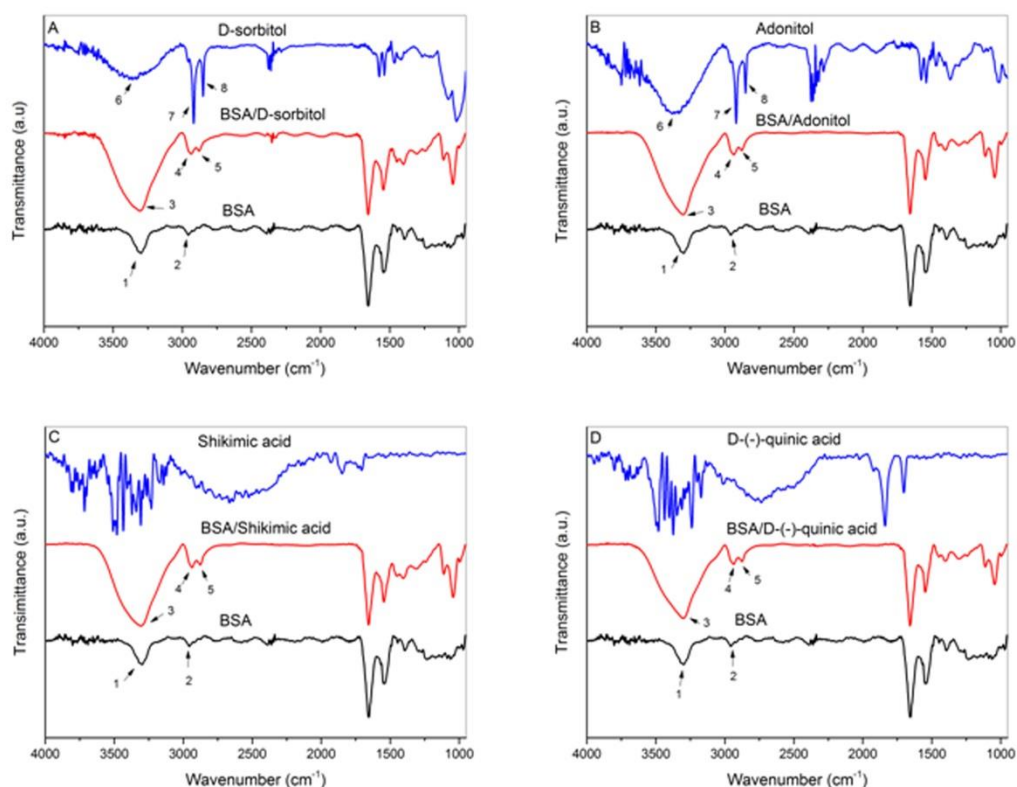

**Figure S3.** FTIR spectra of BSA, cyclitols and their complexes (at 1:10 molar ratio) in the range of 4000-950  $\text{cm}^{-1}$ : A) D-sorbitol (1 – 3300  $\text{cm}^{-1}$ , 2 – 2956  $\text{cm}^{-1}$ ; 3 – 3302  $\text{cm}^{-1}$ ; 4 – 2936  $\text{cm}^{-1}$ ; 5 – 2878  $\text{cm}^{-1}$ ; 6 – 3360  $\text{cm}^{-1}$ ; 7 – 2918  $\text{cm}^{-1}$ ; 8 – 2850  $\text{cm}^{-1}$ ); B) adonitol (1 – 3300  $\text{cm}^{-1}$ , 2 – 2956  $\text{cm}^{-1}$ ; 3 – 3302  $\text{cm}^{-1}$ ; 4 – 2934  $\text{cm}^{-1}$ ; 5 – 2876  $\text{cm}^{-1}$ ; 6 – 3384  $\text{cm}^{-1}$ ; 7 – 2918  $\text{cm}^{-1}$ ; 8 – 2850  $\text{cm}^{-1}$ ); C) shikimic acid (1 – 3300  $\text{cm}^{-1}$ , 2 – 2956  $\text{cm}^{-1}$ ; 3 – 3308  $\text{cm}^{-1}$ ; 4 – 2936  $\text{cm}^{-1}$ ; 5 – 2878  $\text{cm}^{-1}$ ); D) D-(-)-quinic acid (1 – 3300  $\text{cm}^{-1}$ , 2 – 2956  $\text{cm}^{-1}$ ; 3 – 3302  $\text{cm}^{-1}$ ; 4 – 2936  $\text{cm}^{-1}$ ; 5 – 2876  $\text{cm}^{-1}$ ).

**Table S1.** Detailed list of captioned wavenumbers of **Figure 6**.

| A) D-sorbitol  |                                 |
|----------------|---------------------------------|
| Number of peak | Wavenumber [ $\text{cm}^{-1}$ ] |
| 1              | 1654                            |
| 2              | 1568                            |
| 3              | 1548                            |
| 4              | 1492                            |
| 5              | 1446                            |
| 6              | 1392                            |
| 7              | 1356                            |
| 8              | 1294                            |
| 9              | 1272                            |
| 10             | 1238                            |
| 11             | 1122                            |
| 12             | 1088                            |
| 13             | 1062                            |
| 14             | 1000                            |
| 15             | 972                             |
| 16             | 1656                            |
| 17             | 1546                            |
| 18             | 1490                            |

|                         |                                     |
|-------------------------|-------------------------------------|
| 19                      | 1448                                |
| 20                      | 1400                                |
| 21                      | 1304                                |
| 22                      | 1246                                |
| 23                      | 1100                                |
| 24                      | 1044                                |
| 25                      | 998                                 |
| 26                      | 1576                                |
| 27                      | 1540                                |
| 28                      | 1466                                |
| 29                      | 1418                                |
| 30                      | 1264                                |
| 31                      | 1076                                |
| 32                      | 1018                                |
| <b>B) Adonitol</b>      |                                     |
| <b>Number of peak</b>   | <b>Wavenumber [cm<sup>-1</sup>]</b> |
| 1                       | 1654                                |
| 2                       | 1568                                |
| 3                       | 1548                                |
| 4                       | 1492                                |
| 5                       | 1446                                |
| 6                       | 1392                                |
| 7                       | 1356                                |
| 8                       | 1294                                |
| 9                       | 1272                                |
| 10                      | 1238                                |
| 11                      | 1122                                |
| 12                      | 1088                                |
| 13                      | 1062                                |
| 14                      | 1000                                |
| 15                      | 972                                 |
| 16                      | 1656                                |
| 17                      | 1546                                |
| 18                      | 1448                                |
| 19                      | 1400                                |
| 20                      | 1304                                |
| 21                      | 1242                                |
| 22                      | 1122                                |
| 23                      | 1044                                |
| 24                      | 994                                 |
| 25                      | 1576                                |
| 26                      | 1540                                |
| 27                      | 1466                                |
| 28                      | 1410                                |
| 29                      | 1368                                |
| 30                      | 1126                                |
| 31                      | 1092                                |
| 32                      | 1012                                |
| <b>C) Shikimic acid</b> |                                     |
| <b>Number of peak</b>   | <b>Wavenumber [cm<sup>-1</sup>]</b> |
| 1                       | 1654                                |
| 2                       | 1568                                |

| 3                    | 1548                           |
|----------------------|--------------------------------|
| 4                    | 1492                           |
| 5                    | 1446                           |
| 6                    | 1392                           |
| 7                    | 1356                           |
| 8                    | 1294                           |
| 9                    | 1272                           |
| 10                   | 1238                           |
| 11                   | 1122                           |
| 12                   | 1088                           |
| 13                   | 1062                           |
| 14                   | 1000                           |
| 15                   | 972                            |
| 16                   | 1656                           |
| 17                   | 1546                           |
| 18                   | 1454                           |
| 19                   | 1406                           |
| 20                   | 1312                           |
| 21                   | 1242                           |
| 22                   | 1112                           |
| 23                   | 1044                           |
| 24                   | 994                            |
| 25                   | 1930                           |
| 26                   | 1850                           |
| 27                   | 1732                           |
| 28                   | 1706                           |
| D) D-(-)-quinic acid |                                |
| Number of peak       | Wavenumber [cm <sup>-1</sup> ] |
| 1                    | 1654                           |
| 2                    | 1568                           |
| 3                    | 1548                           |
| 4                    | 1492                           |
| 5                    | 1446                           |
| 6                    | 1392                           |
| 7                    | 1356                           |
| 8                    | 1294                           |
| 9                    | 1272                           |
| 10                   | 1238                           |
| 11                   | 1122                           |
| 12                   | 1088                           |
| 13                   | 1062                           |
| 14                   | 1000                           |
| 15                   | 972                            |
| 16                   | 1658                           |
| 17                   | 1548                           |
| 18                   | 1448                           |
| 19                   | 1402                           |
| 20                   | 1302                           |
| 21                   | 1242                           |
| 22                   | 1112                           |
| 23                   | 1044                           |
| 24                   | 996                            |

|    |      |
|----|------|
| 25 | 1922 |
| 26 | 1840 |
| 27 | 1702 |

**Table S2.** Detailed list of captioned wavenumbers of **Figure 7**.

| <b>A) D-sorbitol</b>  |                                     |
|-----------------------|-------------------------------------|
| <b>Number of peak</b> | <b>Wavenumber [cm<sup>-1</sup>]</b> |
| 1                     | 1568                                |
| 2                     | 1511                                |
| 3                     | 1417                                |
| 4                     | 1309                                |
| 5                     | 1096                                |
| 6                     | 976                                 |
| 7                     | 1604                                |
| 8                     | 1568                                |
| 9                     | 1504                                |
| 10                    | 1456                                |
| 11                    | 1412                                |
| 12                    | 1349                                |
| 13                    | 1307                                |
| 14                    | 1234                                |
| 15                    | 1178                                |
| 16                    | 1095                                |
| 17                    | 1045                                |
| 18                    | 987                                 |
| 19                    | 1451                                |
| 20                    | 1255                                |
| 21                    | 1127                                |
| 22                    | 1050                                |
| 23                    | 940                                 |
| <b>B) Adonitol</b>    |                                     |
| <b>Number of peak</b> | <b>Wavenumber [cm<sup>-1</sup>]</b> |
| 1                     | 1568                                |
| 2                     | 1511                                |
| 3                     | 1417                                |
| 4                     | 1309                                |
| 5                     | 1096                                |
| 6                     | 976                                 |
| 7                     | 1569                                |
| 8                     | 1509                                |
| 9                     | 1414                                |
| 10                    | 1309                                |
| 11                    | 1094                                |
| 12                    | 1451                                |

|                             |                                     |
|-----------------------------|-------------------------------------|
| 13                          | 1431                                |
| 14                          | 1376                                |
| 15                          | 1340                                |
| 16                          | 1268                                |
| 17                          | 1132                                |
| 18                          | 1064                                |
| 19                          | 1034                                |
| 20                          | 946                                 |
| <b>C) Shikimic acid</b>     |                                     |
| <b>Number of peak</b>       | <b>Wavenumber [cm<sup>-1</sup>]</b> |
| 1                           | 1568                                |
| 2                           | 1511                                |
| 3                           | 1417                                |
| 4                           | 1309                                |
| 5                           | 1096                                |
| 6                           | 976                                 |
| 7                           | 1568                                |
| 8                           | 1509                                |
| 9                           | 1414                                |
| 10                          | 1309                                |
| 11                          | 1095                                |
| 12                          | 1645                                |
| 13                          | 1441                                |
| 14                          | 1385                                |
| 15                          | 1350                                |
| 16                          | 1269                                |
| 17                          | 1095                                |
| 18                          | 1035                                |
| <b>D) D-(-)-quinic acid</b> |                                     |
| <b>Number of peak</b>       | <b>Wavenumber [cm<sup>-1</sup>]</b> |
| 1                           | 1568                                |
| 2                           | 1511                                |
| 3                           | 1417                                |
| 4                           | 1309                                |
| 5                           | 1096                                |
| 6                           | 976                                 |
| 7                           | 1568                                |
| 8                           | 1508                                |
| 9                           | 1415                                |
| 10                          | 1308                                |
| 11                          | 1095                                |
| 12                          | 976                                 |
| 13                          | 1679                                |
| 14                          | 1513                                |
| 15                          | 1457                                |

|    |      |
|----|------|
| 16 | 1422 |
| 17 | 1098 |
| 18 | 976  |
